# Supplementary material for: Genetic diversity within the genus Francisella as revealed by comparative analyses of the genomes of two North American isolates from environmental sources
Source: PubMed Central journal article supplement (PMC3479022; doi:10.1186/1471-2164-13-422), 2012-08-24
Supplement: 1471-2164-13-422-S1.pdf [file 1471-2164-13-422-S1.pdf]

| SUPPLEMENTAL TABLE 1 Characteristics of putative integrative and transposable elements |                      |           |                  |      |              |                                                                                                             |
|----------------------------------------------------------------------------------------|----------------------|-----------|------------------|------|--------------|-------------------------------------------------------------------------------------------------------------|
| Locus tag, protein                                                                     | Chromosomal location |           | ORF<br>size (bp) | GC % | IS/Tn family | Closest homolog<br>(outside <i>Francisella</i> )<br><br>locus tag, protein, identity <sup>1</sup> , E-value |
|                                                                                        | Start (bp)           | Stop (bp) |                  |      |              |                                                                                                             |
| <i>Francisella</i> strain TX07-7308                                                    |                      |           |                  |      |              |                                                                                                             |
| F7308_0014, 211 aa                                                                     | 13883                | 14518     | 636              | 32   | NA           | RBE_0914, 287 aa, 59%, 2e-81                                                                                |
| F7308_0015, 66 aa                                                                      | 14515                | 14715     | 201              | 29   | NA           | RF_0321, 80 aa, 62%, 1e-21                                                                                  |
| F7308_0290, 376 aa                                                                     | 284310               | 285440    | 1131             | 31   | NA           | PSPA7_5143, 404 aa, 33%, 3e-58                                                                              |
| F7308_0582, 414 aa                                                                     | 578371               | 579615    | 1245             | 32   | NA           | DEFDS_0277, 409 aa, 32%, 5e-49                                                                              |
| F7308_0888, 238 aa                                                                     | 920768               | 921484    | 717              | 31   | NA           | NAL212_1009, 401 aa, 30%, 4e-27                                                                             |
| F7308_0899, 398 aa                                                                     | 925952               | 927148    | 1197             | 31   | NA           | Spro_3887, 404 aa, 29%, 2e-45                                                                               |
| F7308_1212, 50 aa                                                                      | 1244000              | 1244152   | 153              | 24   | IS1016       | Daes_0129, 216 aa, 84%, 2e-19                                                                               |
| F7308_1638, 235 aa                                                                     | 1661548              | 1662255   | 708              | 31   | ISFtu2/IS4   | lpp0083, 249 aa, 53%, 4e-89                                                                                 |
| F7308_1885, 44 aa                                                                      | 1940489              | 1940355   | 135              | 36   | IS1016       | ZP_08940579, 216 aa, 63%, 7e-12                                                                             |

|                                          |         |         |     |    |        |                                |
|------------------------------------------|---------|---------|-----|----|--------|--------------------------------|
| F7308_1886, 115 aa                       | 1941007 | 1940660 | 348 | 32 | IS1016 | NMCC_2051, 134 aa, 73%, 3e-54  |
| F7308_1888, 140 aa                       | 1942900 | 1942478 | 423 | 33 | IS1016 | NMCC_1553, 160 aa, 77%, 8e-70  |
| F7308_1893, 85 aa                        | 1946285 | 1946542 | 258 | 30 | NA     | Cpin_3016, 353 aa, 58%, 4e-19  |
| <i>F. philomiragia</i> strain ATCC 25017 |         |         |     |    |        |                                |
| <a href="#">Fphi_0047, 314 aa</a>        | 42529   | 43473   | 945 | 30 | NA     | XBJ1_0434, 327 aa, 38%, 1e-63  |
| Fphi_0053, 186 aa                        | 51963   | 51403   | 561 | 28 | NA     | Turpa_0527, 202 aa, 39%, 2e-38 |
| <a href="#">Fphi_0058, 314 aa</a>        | 54433   | 55377   | 945 | 30 | NA     | XBJ1_0434, 327 aa, 38%, 1e-63  |
| <a href="#">Fphi_0061, 314 aa</a>        | 57184   | 56240   | 945 | 30 | NA     | XBJ1_0434, 327 aa, 38%, 1e-63  |
| <a href="#">Fphi_0085, 314 aa</a>        | 82743   | 83687   | 945 | 30 | NA     | XBJ1_0434, 327 aa, 38%, 1e-63  |
| <a href="#">Fphi_0119, 314 aa</a>        | 119722  | 120666  | 945 | 30 | NA     | XBJ1_0434, 327 aa, 38%, 1e-63  |
| <a href="#">Fphi_0139, 314 aa</a>        | 138103  | 139047  | 945 | 30 | NA     | XBJ1_0434, 327 aa, 38%, 1e-63  |
| <a href="#">Fphi_0140, 314 aa</a>        | 139671  | 140615  | 945 | 30 | NA     | XBJ1_0434, 327 aa, 38%, 1e-63  |
| <a href="#">Fphi_0182, 314 aa</a>        | 186380  | 187324  | 945 | 30 | NA     | XBJ1_0434, 327 aa, 38%, 1e-63  |
| <a href="#">Fphi_0189, 314 aa</a>        | 192687  | 193631  | 945 | 30 | NA     | XBJ1_0434, 327 aa, 38%, 1e-63  |

|                   |        |        |      |    |                    |                                |
|-------------------|--------|--------|------|----|--------------------|--------------------------------|
| Fphi_0196, 314 aa | 202237 | 201293 | 945  | 30 | NA                 | XBJ1_0434, 327 aa, 38%, 1e-63  |
| Fphi_0210, 314 aa | 220818 | 219874 | 945  | 30 | NA                 | XBJ1_0434, 327 aa, 38%, 1e-63  |
| Fphi_0257, 247 aa | 272511 | 271768 | 744  | 30 | <i>ISFtu2/IS4</i>  | lpp0083, 249 aa, 51%, 2e-91    |
| Fphi_0306, 314 aa | 328318 | 327374 | 945  | 30 | NA                 | XBJ1_0434, 327 aa, 38%, 1e-63  |
| Fphi_0324, 314 aa | 350048 | 350992 | 945  | 30 | NA                 | XBJ1_0434, 327 aa, 38%, 1e-63  |
| Fphi_0371, 314 aa | 415748 | 414804 | 945  | 30 | NA                 | XBJ1_0434, 327 aa, 38%, 1e-63  |
| Fphi_0375, 253 aa | 424460 | 423699 | 762  | 29 | <i>IS4/ IS1106</i> | Dtpsy_3344, 336 aa, 39%, 2e-54 |
| Fphi_0432, 314 aa | 486688 | 487632 | 945  | 30 | NA                 | XBJ1_0434, 327 aa, 38%, 1e-63  |
| Fphi_0478, 314 aa | 524584 | 525528 | 945  | 30 | NA                 | XBJ1_0434, 327 aa, 38%, 1e-63  |
| Fphi_0511, 410 aa | 553181 | 554413 | 1233 | 33 | NA                 | MC1_04020, 376 aa, 61%, 2e-165 |
| Fphi_0670, 314 aa | 707993 | 707049 | 945  | 30 | NA                 | XBJ1_0434, 327 aa, 38%, 1e-63  |
| Fphi_0709, 307 aa | 750409 | 749486 | 924  | 30 | NA                 | XBJ1_0434, 327 aa, 38%, 9e-63  |
| Fphi_0789, 314 aa | 832359 | 831415 | 945  | 30 | NA                 | XBJ1_0434, 327 aa, 38%, 1e-63  |
| Fphi_0798, 131 aa | 842097 | 842492 | 396  | 30 | NA                 | EEZ80801, 239 aa, 38%, 4e-14   |

|                   |         |         |     |    |             |                                 |
|-------------------|---------|---------|-----|----|-------------|---------------------------------|
| Fphi_0799, 154 aa | 842577  | 843041  | 465 | 30 | NA          | Lbuc_0484, 329 aa, 43%, 8e-37   |
| Fphi_0809, 314 aa | 859823  | 860767  | 945 | 30 | NA          | XBJ1_0434, 327 aa, 38%, 1e-63   |
| Fphi_0846, 314 aa | 902889  | 901945  | 945 | 30 | NA          | XBJ1_0434, 327 aa, 38%, 1e-63   |
| Fphi_0852, 314 aa | 907166  | 908110  | 945 | 30 | NA          | XBJ1_0434, 327 aa, 38%, 1e-63   |
| Fphi_0856, 314 aa | 909345  | 910289  | 945 | 30 | NA          | XBJ1_0434, 327 aa, 38%, 1e-63   |
| Fphi_0906, 314 aa | 976223  | 977167  | 945 | 30 | NA          | XBJ1_0434, 327 aa, 38%, 1e-63   |
| Fphi_0979, 314 aa | 1057072 | 1058016 | 945 | 30 | NA          | XBJ1_0434, 327 aa, 38%, 1e-63   |
| Fphi_0984, 154 aa | 1062847 | 1062383 | 465 | 30 | NA          | Lbuc_0484, 329 aa, 43%, 3e-38   |
| Fphi_0985, 98 aa  | 1063328 | 1063032 | 297 | 30 | NA          | Desde_2449, 315 aa, 40%, 7e-11  |
| Fphi_0987, 314 aa | 1065547 | 1064603 | 945 | 30 | NA          | XBJ1_0434, 327 aa, 38%, 1e-63   |
| Fphi_1120, 314 aa | 1210168 | 1211112 | 945 | 30 | NA          | XBJ1_0434, 327 aa, 38%, 1e-63   |
| Fphi_1130, 293 aa | 1219928 | 1219047 | 882 | 30 | NA          | Metme_0370, 301 aa, 46%, 2e-85  |
| Fphi_1175, 110 aa | 1281654 | 1281322 | 333 | 32 | NA          | Marme_3758, 387 aa, 42%, 8e-17  |
| Fphi_1176, 266 aa | 1283065 | 1282265 | 801 | 32 | IS4/ IS1106 | NAL212_0351, 357 aa, 38%, 9e-58 |

|                   |         |         |     |    |        |                               |
|-------------------|---------|---------|-----|----|--------|-------------------------------|
| Fphi_1184, 314 aa | 1288971 | 1289915 | 945 | 30 | NA     | XBJ1_0434, 327 aa, 38%, 1e-63 |
| Fphi_1192, 314 aa | 1299962 | 1299018 | 945 | 30 | NA     | XBJ1_0434, 327 aa, 38%, 1e-63 |
| Fphi_1306, 314 aa | 1420103 | 1419159 | 945 | 30 | NA     | XBJ1_0434, 327 aa, 38%, 1e-63 |
| Fphi_1392, 154 aa | 1525133 | 1524669 | 465 | 30 | NA     | Lbuc_0484, 329 aa, 43%, 3e-38 |
| Fphi_1394, 141 aa | 1525612 | 1525187 | 426 | 30 | NA     | EEZ80801, 239 aa, 38%, 6e-14  |
| Fphi_1490, 166 aa | 1619410 | 1618910 | 501 | 30 | NA     | RF_p54, 230 aa, 63%, 2e-66    |
| Fphi_1491, 63 aa  | 1620885 | 1620694 | 192 | 28 | IS1016 | NGK_2380, 109 aa, 81%, 1e-27  |
| Fphi_1500, 314 aa | 1629429 | 1630373 | 945 | 30 | NA     | XBJ1_0434, 327 aa, 38%, 1e-63 |
| Fphi_1506, 314 aa | 1637569 | 1636625 | 945 | 30 | NA     | XBJ1_0434, 327 aa, 38%, 1e-63 |
| Fphi_1523, 314 aa | 1654041 | 1654985 | 945 | 30 | NA     | XBJ1_0434, 327 aa, 38%, 1e-63 |
| Fphi_1527, 314 aa | 1659290 | 1658346 | 945 | 30 | NA     | XBJ1_0434, 327 aa, 38%, 1e-63 |
| Fphi_1553, 314 aa | 1687967 | 1687023 | 945 | 30 | NA     | XBJ1_0434, 327 aa, 38%, 1e-63 |
| Fphi_1560, 314 aa | 1693135 | 1694079 | 945 | 30 | NA     | XBJ1_0434, 327 aa, 38%, 1e-63 |
| Fphi_1608, 314 aa | 1741244 | 1742188 | 945 | 30 | NA     | XBJ1_0434, 327 aa, 38%, 1e-63 |

|                   |         |         |      |    |        |                                |
|-------------------|---------|---------|------|----|--------|--------------------------------|
| Fphi_1740, 552 aa | 1871596 | 1869938 | 1659 | 32 | Tn1546 | ZP_08534575, 999 aa, 63%, 0.0  |
| Fphi_1741, 314 aa | 1872561 | 1871617 | 945  | 30 | NA     | XBJ1_0434, 327 aa, 38%, 1e-63  |
| Fphi_1742, 238 aa | 1873345 | 1872629 | 717  | 26 | Tn3    | MEALZ_2137, 654 aa, 42%, 8e-59 |
| Fphi_1743, 137 aa | 1873848 | 1873435 | 414  | 28 | Tn3    | Maqu_3975, 236 aa, 38%, 3e-28  |
| Fphi_1744, 189 aa | 1874414 | 1873845 | 570  | 32 | NA     | pPHDP10_p3, 194 aa, 69%, 3e-91 |
| Fphi_1750, 314 aa | 1879145 | 1878201 | 945  | 30 | NA     | XBJ1_0434, 327 aa, 38%, 1e-63  |
| Fphi_1821, 398 aa | 1946589 | 1947785 | 1197 | 31 |        | Q7A_2891, 401 aa, 34%, 1e-55   |
| Fphi_1881, 314 aa | 2011453 | 2012397 | 945  | 30 | NA     | XBJ1_0434, 327 aa, 38%, 1e-63  |
| Fphi_1884, 314 aa | 2014125 | 2015069 | 945  | 30 | NA     | XBJ1_0434, 327 aa, 38%, 1e-63  |
| Fphi_1859, 314 aa | 1991163 | 1990219 | 945  | 30 | NA     | XBJ1_0434, 327 aa, 38%, 1e-63  |
| Fphi_1890, 314 aa | 2020949 | 2021893 | 945  | 30 | NA     | XBJ1_0434, 327 aa, 38%, 1e-63  |

<sup>1</sup>Identity across the entire length of the query protein; NA = Not applicable/available

In the first column, 42 full-length and 5 truncated genes encoding putative integrases are color coded blue and pink, respectively.
